# Supplementary material for: Designing and fabricating of surface-enhanced Raman scattering substrate with high density hot spots by polyaniline template-assisted self-assembly
Source: Royal Society of Chemistry journal article supplement (doi:10.1039/c2nr31339a), 2012-01-01
Supplement: c2nr31339a.pdf [file c2nr31339a.pdf]

## Supporting Information

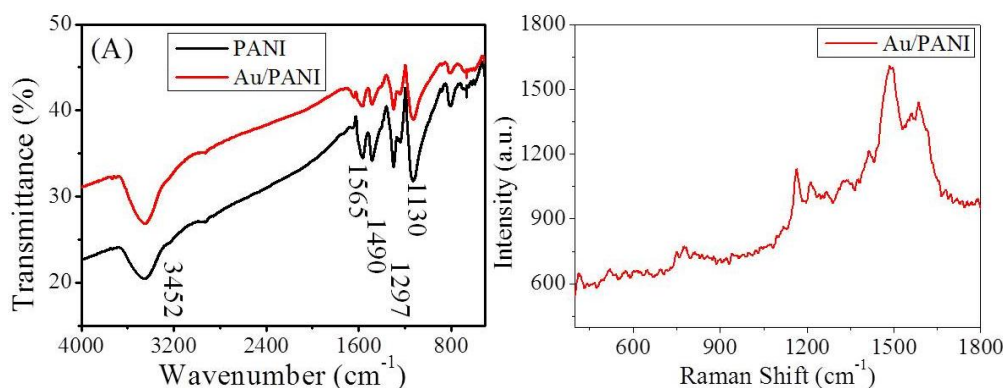

**Figure 1S.** (A) IR spectrum of the PANI and Au/PANI composites and (B) the SERS spectrum of pure Au/PANI.

The FT-IR spectrum (see Figure 1S-A) of the PANI composites showed two main peaks at 1490 and 1565 cm<sup>-1</sup> corresponding to the stretching deformation mode of N-B-N (B represents the quinoid ring) groups. The band at 3452 cm<sup>-1</sup> represents N-H stretching mode. The band at 1297 cm<sup>-1</sup> is assigned to the C-N stretching mode in a secondary aromatic amine. The band at 1130 cm<sup>-1</sup> corresponds to an aromatic C-H in-plane bending mode<sup>1</sup>.

Raman spectrum of the Au/PANI is given in Figure 1S-B. The characteristic peaks at 1586, 1490 and 1164 cm<sup>-1</sup> conform that the PANI is closed to Au nanoparticles<sup>1</sup>.

1. K. Mallick, M. J. Witcomb, A. Dinsmore and M. S. Scurrill, *Macromol Rapid Comm.*, 2005, **26**, 232-235.
